# Supplementary material for: Psychological Distress Severity of Adults Reporting Receipt of Treatment for Mental Health Problems in the BRFSS
Source: Atypon-hosted journal article supplement (doi:10.1176/ps.62.4.pss6204_0396), 2011-04-01
Supplement: dhingra_DS.pdf [file dhingra_DS.pdf]

**Table 3**

Logistic regression to determine predictors of receipt of medication or other treatment for mental or emotional problems by respondents to the 2007 Behavioral Risk Factor Surveillance Survey

| Variable                                                 | OR                | 95% CI     | Adjusted |            |
|----------------------------------------------------------|-------------------|------------|----------|------------|
|                                                          |                   |            | OR       | 95% CI     |
| Female (reference: male)                                 | 1.89              | 1.79–2.00  | 1.87     | 1.76–1.99  |
| Race (reference: Non-Hispanic white)                     |                   |            |          |            |
| Non-Hispanic black                                       | .64               | .57–.71    | .40      | .35–.46    |
| Hispanic                                                 | .49               | .44–.55    | .45      | .39–.51    |
| Asian or other                                           | .59               | .52–.66    | .50      | .43–.58    |
| Age (reference: 18–24)                                   |                   |            |          |            |
| 25–34                                                    | 1.58              | 1.35–1.85  | 1.71     | 1.43–2.04  |
| 35–44                                                    | 2.06              | 1.78–2.39  | 2.17     | 1.82–2.57  |
| 45–54                                                    | 2.65              | 2.30–3.06  | 2.44     | 2.06–2.90  |
| ≥55                                                      | 2.18              | 1.89–2.50  | 1.73     | 1.45–2.06  |
| Education (reference: less than high school)             |                   |            |          |            |
| High school                                              | 1.01 <sup>a</sup> | .92–1.11   | 1.23     | 1.09–1.38  |
| More than high school                                    | .98 <sup>a</sup>  | .90–1.07   | 1.45     | 1.29–1.64  |
| Marital status (reference: currently married)            |                   |            |          |            |
| Previously married                                       | 1.74              | 1.64–1.84  | 1.19     | 1.10–1.28  |
| Never married                                            | .98 <sup>a</sup>  | .91–1.06   | 1.33     | 1.21–1.47  |
| Employment status (reference: employed)                  |                   |            |          |            |
| Unemployed                                               | 1.84              | 1.63–2.09  | 1.67     | 1.44–1.94  |
| Retired                                                  | 1.30              | 1.22–1.39  | 1.11     | 1.02–1.22  |
| Unable to work                                           | 7.42              | 6.83–8.06  | 3.62     | 3.24–4.05  |
| Other                                                    | 1.27              | 1.16–1.38  | 1.23     | 1.11–1.35  |
| Annual income (reference: <\$20,000)                     |                   |            |          |            |
| \$20,000–\$49,999                                        | .67               | .62–.72    | 1.08     | .98–1.19   |
| \$50,000–\$74,999                                        | .63               | .57–.69    | 1.11     | .99–1.25   |
| ≥\$75,000                                                | .58               | .53–.62    | 1.12     | .99–1.26   |
| Missing                                                  | .64               | .58–.71    | .91      | .81–1.03   |
| Chronic conditions (reference: none) <sup>b</sup>        |                   |            |          |            |
| 1                                                        | 1.59              | 1.50–1.69  | 1.39     | 1.30–1.49  |
| 2                                                        | 2.35              | 2.18–2.54  | 1.75     | 1.60–1.91  |
| 3                                                        | 3.13              | 2.80–3.50  | 1.98     | 1.73–2.28  |
| ≥4                                                       | 3.42              | 3.08–3.81  | 1.92     | 1.68–2.21  |
| Health plan (reference: no)                              | 1.59              | 1.46–1.74  | 1.98     | 1.76–2.23  |
| Psychological distress severity (reference: no distress) |                   |            |          |            |
| Mild to moderate                                         | 4.50              | 4.18–4.85  | 4.61     | 4.25–5.01  |
| Serious                                                  | 10.85             | 9.80–12.02 | 9.58     | 8.53–10.75 |

<sup>a</sup> Not significant

<sup>b</sup> Diabetes, arthritis, asthma, cardiovascular disease—myocardial infarction, cardiovascular disease—heart disease, and stroke
